1 **Breeding seasonality generates reproductive trade-offs in a long-**  
2 **lived mammal**

3  
4 **AUTHORS**

5 Jules Dezeure<sup>1,5,\*</sup>, Alice Baniel<sup>2</sup>, Alecia J. Carter<sup>3</sup>, Guy Cowlshaw<sup>4</sup>, Bernard Godelle<sup>1</sup>, Elise  
6 Huchard<sup>1</sup>

7  
8 **AFFILIATIONS**

9 <sup>1</sup>Institute of Evolutionary Sciences of Montpellier (ISEM), Université de Montpellier, CNRS,  
10 IRD, EPHE, Montpellier, France.

11 <sup>2</sup>Department of Anthropology, Stony Brook University, Stony Brook, NY, USA

12 <sup>3</sup>Department of Anthropology, University College London, London, UK

13 <sup>4</sup>Institute of Zoology, Zoological Society of London, Regent's Park, London NW1 4RY

14 <sup>5</sup>Lead contact

15 \*Corresponding author: Jules Dezeure, +33611336906, ISEM, 1093 Route de Mende, 34090  
16 Montpellier, France.

17 Email: [dezeurejules@gmail.com](mailto:dezeurejules@gmail.com)

18  
19 **AUTHORS CONTRIBUTIONS**

20 J.D. and E.H. designed the study, and J.D. ran the analysis. J.D., A.B., A.C., G.C. and E.H.  
21 collected the data, and all authors contributed to the drafting of the manuscript. E.H. acquired  
22 the funding for the project leading to this publication.

23  
24 **COMPETING INTEREST STATEMENT**

25 The authors declare no competing interests.

26

## 27 **KEYWORDS**

28 Reproductive seasonality, birth timing, life-history trade-offs, mother-offspring conflict,  
29 primates

30

## 31 **ABSTRACT**

32 The evolutionary benefits of reproductive seasonality are usually measured by a single fitness  
33 component, namely offspring survival to nutritional independence (Bronson, 2009). Yet  
34 different fitness components may be maximised by dissimilar birth timings. This may generate  
35 fitness trade-offs that could be critical to understanding variation in reproductive timing across  
36 individuals, populations and species. Here, we use long-term demographic and behavioural data  
37 from wild chacma baboons (*Papio ursinus*) living in a seasonal environment to test the adaptive  
38 significance of seasonal variation in birth frequencies. Like humans, baboons are eclectic  
39 omnivores, give birth every 1-3 years to a single offspring that develops slowly, and typically  
40 breed year-round. We identify two distinct optimal birth timings in the annual cycle, located 4-  
41 months apart, which maximize offspring survival or minimize maternal interbirth intervals  
42 (IBIs), by respectively matching the annual food peak with late or early weaning. Observed  
43 births are the most frequent between these optima, supporting an adaptive trade-off between  
44 current and future reproduction. Furthermore, infants born closer to the optimal timing  
45 favouring maternal IBIs (instead of offspring survival) throw more tantrums, a typical  
46 manifestation of mother-offspring conflict (Maestripieri, 2002). Maternal trade-offs over birth  
47 timing, which extend into mother-offspring conflict after birth, may commonly occur in long-  
48 lived species where development from birth to independence spans multiple seasons. Such  
49 trade-offs may substantially weaken the benefits of seasonal reproduction, and our findings

50 therefore open new avenues to understanding the evolution of breeding phenology in long-lived  
51 animals, including humans.

52

## 53 **SIGNIFICANCE STATEMENT**

54 Why some species breed seasonally and others do not remain unclear. The fitness consequences  
55 of birth timing have traditionally been measured on offspring survival, ignoring other fitness  
56 components. We investigated the effects of birth timing on two fitness components in wild  
57 baboons, who breed year-round despite living in a seasonal savannah. Birth timing generates a  
58 trade-off between offspring survival and future maternal reproductive pace, meaning that  
59 mothers cannot maximize both. When birth timing favours maternal reproductive pace (instead  
60 of offspring survival), behavioural manifestations of mother-offspring conflict around weaning  
61 are intense. These results open new avenues to understand the evolution of reproductive timings  
62 in long-lived animals including humans, where such reproductive trade-offs may commonly  
63 weaken the intensity of reproductive seasonality.

64

## 65 **MAIN TEXT**

### 66 **Introduction**

67 Empirical studies investigating variation in reproductive timing have mostly focused on fast-  
68 lived seasonal breeders, whose development from birth to independence generally occurs  
69 within the most productive season (1). In long-lived mammals, the reproductive cycle from  
70 birth to weaning cannot similarly be squeezed into one annual food peak, and consequently,  
71 females must choose which stage(s) of the reproductive cycle to synchronize with one or more  
72 food peak(s). For example, female mammals could match the annual food peak to coincide with  
73 either late-weaning or mid-lactation, but usually not both. The reproductive timing strategy is  
74 likely to depend on how females trade-off the survival of their offspring (mortality risks tend

75 to peak at the end of weaning) (2–4) with their own reproductive costs (energetic demands tend  
76 to peak around mid-lactation) (5, 6). Whether such reproductive timing strategies can vary  
77 within populations is largely unknown. In addition, while evolutionary trade-offs between  
78 offspring quality and quantity have been described both within and across species, through  
79 associations between birth spacing and infant growth and survival (7–11), the existence of  
80 maternal trade-offs over birth timing have only been suggested theoretically (3) and never tested  
81 empirically in mammals (but see for a bird species, *Fulica atra*: (12)).

82         Here, we investigate variation in maternal reproductive success and mother-offspring  
83 relationships associated with variable birth timings in the annual cycle of wild chacma baboons  
84 (*Papio ursinus*), living in a seasonal semi-arid savannah (Tsaobis, Namibia). Baboons are  
85 African primates distributed across a wide latitudinal range, and a classic model for  
86 understanding how early humans adapted to seasonal savannahs (13, 14). In particular, baboons  
87 typically breed year-round (15), and are therefore considered non-seasonal breeders, though the  
88 distribution of births shows moderate seasonality (i.e. varies along the annual cycle) in some  
89 species and populations (16–18). In addition, infant baboons, like many young primates  
90 including human toddlers, commonly perform tantrums, a manifestation of mother-offspring  
91 conflict (19–22). Using a combination of detailed long-term life-history and behavioural data  
92 collected over 15 years (2005–2019), we first characterize the reproductive and environmental  
93 seasonality of the Tsaobis baboons. Second, we quantify the consequences of birth timing on  
94 two components of female fitness: offspring survival and maternal inter-birth intervals (IBIs),  
95 and identify two distinct birth timing optima. We further test whether individual traits predict  
96 whether a female is more likely to give birth around one or the other optimum. Third, we  
97 investigate if compensatory maternal care mitigates the costs of suboptimal birth timing for  
98 offspring, and whether infants born, and subsequently weaned, in suboptimal timings increased  
99 their tantrum frequency.

100

## 101 **Results**

### 102 **1. Tsaobis baboons breed year-round despite living in a seasonal environment**

103 Conceptions, births and cycle resumptions occurred throughout the year (Figure S1), indicating  
104 an absence of a strict breeding season. We used circular statistics to test whether moderate  
105 seasonality may still occur, computing respectively the mean annual angle ( $\mu$ ) and Rayleigh  
106 tests (R and p-values) for the annual distribution of 241 conceptions, 215 births and 171 cycle  
107 resumptions recorded between 2005-2019. The frequency of conceptions and births showed  
108 slight seasonal variations, which reached statistical significance for conceptions only  
109 (conceptions:  $\mu$  = May 12, R=0.13, p=0.02; births:  $\mu$ = November 18, R=0.09, p=0.17; cycle  
110 resumptions:  $\mu$ = December 4, R=0.08, p=0.36, Figure S1).

111 Environmental seasonality was pronounced at Tsaobis (Figure 1A). Mean annual  
112 rainfall was low and variable (mean  $\pm$  SD = 192  $\pm$  143mm), falling mostly between January  
113 and April (Figure 1A). Following previous baboon studies (23, 24), we quantified food  
114 availability for baboons using the Normalized Difference Vegetation Index (NDVI), a satellite-  
115 based proxy of primary productivity with higher values corresponding to a higher degree of  
116 greenness (25). Seasonal variation in NDVI followed a similar, but slightly lagged pattern, to  
117 rainfall (Figure 1A). The highest birth frequency occurred in October-November, preceding the  
118 peak in rainfall (February) and NDVI (March-April, Figure 1A).

119

### 120 **2. Distinct birth timings optimize current versus future reproduction**

121 There was an influence of birth timing on two indicators of maternal fitness. First, birth timing  
122 affects offspring survival (Table S1): infants born between November 15<sup>th</sup> and January 1<sup>st</sup> were  
123 the most likely to survive until weaning (Table S2), indicating an optimal birth timing for

124 offspring survival in the annual cycle (Figure 2A). Second, the duration of maternal IBI is  
125 influenced by the timing of the birth opening the IBI (Table S1): females giving birth between  
126 August 1<sup>st</sup> and September 15<sup>th</sup> had the shortest IBIs (Table S2), indicating another different  
127 optimal birth timing for maternal reproductive pace in the annual cycle (Figure 2B). In the first  
128 case, the birth timing that maximises offspring survival synchronizes the seasonal food peak  
129 with the end of weaning, a highly vulnerable life stage for mammals (26–28), which occurs  
130 between 12 and 18 months after birth in this population (Figure 1B). In the second case, the  
131 birth timing that maximizes maternal reproductive pace synchronizes the food peak with the  
132 peak of lactation (occurring around 6 months after birth) (Figure 1B), which is the most  
133 energetically-costly reproductive stage for mothers (3, 26), and may therefore help to alleviate  
134 the costs of lactation and enhance maternal condition during the second half of lactation. The  
135 two months counting most births are October and November (i.e. 28.4% of annual births, Figure  
136 1A) and the mean annual birth date is Nov 18<sup>th</sup>, indicating a reproductive trade-off over birth  
137 timing, that pushes mothers to target the very first days of the offspring survival optimal birth  
138 timing, in order to avoid compromising offspring mortality while minimizing the costs on their  
139 reproductive pace (Figure 2C).

140 This result raises the possibility that some females might be more likely to time their  
141 births to maximise current over future reproduction, or vice versa. In particular, dominance rank  
142 and parity can affect various aspects of individual reproductive performance, including  
143 offspring survival and IBI (29–31), and may influence birth timing strategies accordingly.  
144 Similarly, mothers conceiving close to the optimal timing for maternal IBIs, which alleviates  
145 the energetic costs of lactation, may subsequently favour male over female embryos, which are  
146 more costly to produce in sexually dimorphic mammals (29, 32, 33). However, we failed to  
147 detect any significant variance associated with maternal identity on the deviation between  
148 observed birth and the optimal birth timing maximizing offspring survival (LRT=0.66, p=0.42)

149 versus maternal IBI (LRT=0.00,  $p=0.98$ ). This suggests that females did not consistently target  
150 one timing over the other across successive births. Moreover, female parity, rank and infant sex  
151 did not influence the proximity of birth timing in relation to each optimum (Table 1).

152

### 153 **3. Birth timings favouring future reproduction intensify mother-offspring conflict**

154 In order to test whether maternal care may compensate for the costs of suboptimal birth timings  
155 in offspring, we investigated the effects of birth timing on the frequency of suckling and infant  
156 carrying. We did not find any effect of infant birth date on patterns of maternal care (Table S3).  
157 Further analyses revealed that mothers increase maternal care in the dryer winter months, but  
158 such compensation occurs regardless of an infant's birth date (Appendix 1, Table S4).

159 We also investigated whether infants born in suboptimal timings may beg maternal care  
160 more frequently, looking at tantrum frequencies. We found that infants born near the maternal  
161 IBI optimal timing, i.e. between August 1<sup>st</sup> and October 1<sup>st</sup> (Table S2), were more likely to  
162 exhibit tantrums than other infants (Table S3, Figure 3). Observation date did not affect tantrum  
163 frequencies, meaning that such an effect was independent of the season of observation (Table  
164 S4).

165

## 166 **Discussion**

167 Our results further our understanding of the evolution of vertebrate reproductive timing in  
168 several ways. First, we identify two distinct optimal birth timings in the annual cycle,  
169 respectively favouring current reproduction (offspring survival) versus future reproduction  
170 (maternal reproductive pace). These are separated by four months, and the highest birth  
171 frequency occurs between these optima, indicating that mothers balance current and future  
172 reproduction, with a priority for offspring survival. Trade-offs over birth timing may be  
173 widespread in long-lived species with slow life histories, for which development from birth to

174 independence spans several months, therefore exceeding the length of the most productive  
175 season. In such cases, different stage(s) of the reproductive cycle may be synchronized with  
176 one or more seasonal food peaks, with the specific pattern dependent on the trade-offs females  
177 make among different fitness components (34). Such variation could account for empirical  
178 cases where the observed birth peak fails to coincide with the birth timing expected on the basis  
179 of a single fitness measure. For example, in humans from pre-industrial Finland, births did not  
180 concentrate in the months with the highest infant survival expectations (35). More generally,  
181 such trade-offs may contribute to explain the partial or total lack of breeding seasonality  
182 observed in some large mammals (36), such as social primates including apes (18) and humans  
183 (37, 38).

184         Second, this study challenges the idea according to which non-seasonal breeding has  
185 evolved in response to an absence of optimal birth timing in the annual cycle, especially in  
186 species with ecological or physiological traits that buffer seasonal environmental variation (39).  
187 For example, chacma baboons and humans share a generalist diet (27), a capacity to extract  
188 fall-back foods at times of food scarcity (40), and an ability to store energy (2, 4), which have  
189 likely played a critical role in their adaptation to breed year-round in seasonal environments  
190 (41, 42). The few studies that have investigated the effects of birth timing on early survival of  
191 offspring in non-seasonal breeding primates such as geladas (*Theropithecus gelada*) (43) have  
192 indeed failed to detect any effect. In modern humans, fitness variation associated with seasonal  
193 birth timing is rare (38, 44), and where detectable, only has mild effects on adult longevity (45,  
194 46). The fitness consequences of seasonal birth timing detected here were therefore unexpected,  
195 and surprisingly reveal that non-seasonal breeding can be favoured even where reproductive  
196 success depends on birth timing. Future work will usefully test the generality of these patterns  
197 in other species or populations that breed year-round to shed more light on the conditions  
198 favouring evolutionary transitions towards non-seasonal breeding.



199 Third, while different species synchronize different stages of their reproductive cycle  
200 with the seasonal food peak (1, 2, 47, 48), this study reveals variations in breeding timing within  
201 the same population. However, while mothers experience a trade-off between reproductive pace  
202 and offspring survival in their birth timing, it is not clear if particular individuals consistently  
203 favour certain strategies, as we did not detect any inter-individual effects of female identity,  
204 parity or rank on parturition timing. Instead, intra-individual factors, such as maternal  
205 reproductive history, may constrain the evolution of such individually-based specializations, if  
206 only because the duration of IBIs - 22 months on average but with extensive variation - prevents  
207 females from giving birth every two years at the same season. In addition, the costs of waiting  
208 for the next optimal timing may often outweigh the costs of giving birth at suboptimal timings.  
209 Overall, the fact that the highest frequency of births occur between the two optima or at the  
210 onset of the period maximizing offspring survival suggests that most females attempt to  
211 maximize offspring survival while optimizing their own reproductive pace.

212 Fourth, this study underlines the importance of weaning to understand the evolution of  
213 mammalian reproductive schedules. Late-weaning is most critical for infants who must learn to  
214 ensure their own provisioning. Matching that stage with the most productive season may  
215 substantially enhance infant survival (26, 27, 49, 50). Moreover, the peak of lactation typically  
216 coincides with the onset of weaning, and matching it with abundant resources can help to  
217 accelerate the transition to feeding independence by granting infants access to a wealth of  
218 weaning foods (Figure 1B) (26). Earlier weaning, in combination with better maternal  
219 nutritional condition, will likely promote the resumption of cycling (51–53), and may contribute  
220 to explain the shorter interbirth intervals associated with this birth timing. Such patterns may  
221 be very general. In the lemur radiation, for instance, despite a variety of life-histories, ecologies  
222 and societies, and the fact that different species mate and give birth at different times of year,  
223 all species synchronize weaning with the food peak (49). Our understanding of the ultimate

224 causes of mammalian reproductive seasonality may gain from granting more consideration to  
225 the dynamics and consequences of weaning, which may have been underappreciated in  
226 comparison to the energetic costs of pregnancy and lactation (1, 2, 4).

227 Fifth, our results show that the trade-off over birth timing faced by mothers may  
228 subsequently translate into mother-offspring conflict after birth. Although mothers adjust  
229 maternal care seasonally, they do so regardless of the offspring's age. Offspring born at  
230 suboptimal periods face the dry season in a critical developmental window (i.e., the end of  
231 weaning), and maternal care is insufficient to buffer them entirely from the adverse  
232 consequences that lead to higher mortality. Consequently, baboon infants respond by throwing  
233 more tantrums, which may be an honest signal of need (21, 54), just as children do in similar  
234 situations (22). More generally, these results shed light on the potential influence of  
235 environmental fluctuations, and specifically seasonality, on mother-offspring conflicts over  
236 maternal care. While the literature focusing on optimal birth spacing has mainly examined  
237 trade-offs between current and future reproduction for an implicitly stable level of resources (7,  
238 55), such a stability may rarely be encountered by mothers in the wild (56, 57), who typically  
239 face extensive, but partly predictable, fluctuations in food availability. Taking into account the  
240 intensity and predictability of resource fluctuations may largely re-draw the landscape of  
241 strategic decisions available to mothers confronted with trade-offs between current and future  
242 reproduction in natural environments (57, 58).

243 Our findings open new perspectives to understand the evolutionary drivers of vertebrate  
244 reproductive seasonality, by revealing the occurrence of a maternal trade-off between current  
245 and future reproduction over birth timing, extended by mother-offspring conflict during  
246 weaning. Such a trade-off may commonly occur in organisms with a slow reproductive pace,  
247 and future studies on such taxa should investigate the consequences of reproductive timing on  
248 several fitness components. Indeed, multiple optimal birth timings in the annual cycle may

249 generate a bimodal birth peak or an extended birth season. Evolutionary trade-offs over birth  
250 timing may therefore account for unexplained variation in the reproductive timing of long-lived  
251 vertebrates, including the evolution of non-seasonal breeding in humans and other species.

252

## 253 **Materials and methods**

254

### 255 **Study site and population**

256 Three habituated groups of wild chacma baboons were followed between 2005 and 2019: J and  
257 L since 2005, and M, a fission group from J, since 2016. They live in a desert-edge population  
258 at Tsaobis Nature Park (22°23S, 15°44'50E) in Namibia, in a strongly seasonal environment:  
259 the desert vegetation responds quickly to the austral summer rains, which usually fall between  
260 December and April, and then dies back during the dry winter months (59). Water is always  
261 available through the presence of both natural seeps and artificial water points for wildlife and  
262 livestock. A field team was present each year, mainly during winter (between May to October),  
263 for a variable number of months (mean = 4.5, range: 1.9-7.9), that collected daily demographic  
264 and behavioural data, as well as GPS locations, while following the groups on foot. All  
265 individuals, including infants, are individually recognizable thanks to small ear markings  
266 performed during capture and/or other distinctive features.

267

### 268 **Environmental data**

269 In order to describe the relationship between reproductive and environmental seasonalities, we  
270 characterize two aspects of environmental seasonality at Tsaobis: rainfall and vegetation cover  
271 (an index of food availability).

272         Daily rainfall in a 0.25 × 0.25 degree grid cell resolution (corresponding to 28 × 28 km  
273 at this latitude) was extracted using satellite data sensors from the Giovanni NASA website

274 (product TRMM 3B42) (60), from a rectangular geographic area encompassing the global  
275 ranging area of the Tsaobis baboons, computed using GPS locations collected by observers  
276 every 30 min when following the study groups. We used the minimal and maximal latitude and  
277 longitude recorded between 2005 and 2019. Monthly cumulative rainfall (summed across daily  
278 values) were computed between 2005 and 2019.

279 We used the Normalized Difference Vegetation Index (NDVI) as an index of food  
280 availability. NDVI is computed using the near-infrared and red light reflected by the surface of  
281 an area and measured with satellite sensors; it produces a quantitative index of primary  
282 productivity with higher values corresponding to a higher degree of vegetation cover (25). It  
283 has previously been used as an indicator of habitat quality for the Tsaobis baboons (24) and  
284 other baboon populations (23). We further confirmed that temporal variation in NDVI reflected  
285 temporal variation in rainfall: mean cumulative rainfall over the past three months explained  
286 between 60-72% of the NDVI variation (Appendix 2). To index food availability using NDVI  
287 for each troop, we first computed 100% isopleth home ranges for each group using kernel  
288 density estimates with the adehabitatHR package ('kernelUD' function) (61), based on the daily  
289 30-min GPS locations from 2005-2019 (from 2016-2019 for M group). We obtained one home  
290 range per group for the entire study period. We then extracted the mean NDVI per 16 day-  
291 period on a 500 m  $\times$  500 m resolution across these periods using MODIS data (MODIS13A1  
292 product) provided by NASA (25) within these home ranges for each group. Daily NDVI was  
293 computed by linear interpolation and then averaged to obtain a monthly value. In contrast to  
294 rainfall, NDVI was measured with greater resolution and for each group separately because  
295 baboons finely adjust their ranging behaviour in relation to food availability (62).

296

297 **Individual data**

298 A female was considered adult when she reached menarche. The reproductive state of each  
299 adult female was monitored daily. A female could be: (i) pregnant (assessed by the paracallosal  
300 skin turning red and absence of cycles over the following months), with the exact start date of  
301 pregnancy being determined *post hoc* following infant birth, and encompassing 190 days (mean  
302 gestation length in this population,  $n = 13$  pregnancies where both conception and birth were  
303 observed, range: 181-200 days,  $SD = 5$ ) between conception and birth; (ii) lactating, as long as  
304 the female did not resume cycling after an infant birth; (iii) cycling, including both swollen  
305 females in oestrus (i.e., sexually receptive with a perineal swelling) and non-swollen females  
306 at other stages of their cycle. Conceptive cycles were established based on the beginning of a  
307 pregnancy, and were usually confirmed by a birth. The first post-partum cycle (i.e. cycle  
308 resumption) is the first cycle following an infant's birth, when the female resumes cycling after  
309 lactation. The exact date of the cycle resumption corresponds to the first day of oestrus of the  
310 first post-partum cycle, i.e. the first day when a sexual swelling is recorded. The dates of these  
311 reproductive events (conceptions, births and cycling resumptions) were either known with  
312 accuracy when recorded by field observers, or estimated in the absence of observers using the  
313 methods detailed in Appendix 3 and Table S5.

314 Female parity was known from life history records and defined as primiparous (between  
315 the birth of her first and second infant) or multiparous (after the birth of her second infant).

316 Female social rank was established annually for each group using *ad libitum* and focal  
317 observations of agonistic interactions between adult females: supplants, displacements, attacks,  
318 chases and threats (Huchard and Cowlshaw 2011). We computed a linear hierarchy using  
319 Matman 1.1.4 (Noldus Information Technology, 2013), and then converted to a relative rank to  
320 control for group size (i.e. the number of adult females in the group). Each female was thus  
321 assigned one rank per year, ranging from 0 (lowest ranking) to 1 (highest ranking).

322

323 **Fitness data**

324 We tested the influence of birth timing in the annual cycle on two fitness measures, namely  
325 offspring mortality before weaning and the duration of the maternal interbirth interval. For each  
326 infant born between 1<sup>st</sup> January 2005 and 1<sup>st</sup> August 2018, we investigated whether it died  
327 (yes/no) before weaning. The weaning age was identified as 550 days on the basis of the  
328 maximum length of post-partum anoestrus (n = 33 cases for which both birth and cycle  
329 resumption were known with accuracy, see also Appendix 4), and presumably reflected the  
330 upper threshold of weaning age in our population, assuming that females who resumed cycling  
331 had weaned their offspring, as lactation has suppressive effects on ovulation among primates  
332 (51, 52, 64). Death was recorded when a corpse was observed or when the infant had been  
333 missing in the group for five consecutive days. Infants born later than August 2018 were not  
334 considered as their survival outcome was unknown. Four infants that disappeared between  
335 consecutive field seasons were omitted because we could not establish whether the age of death  
336 was before or after 550 days. In our final dataset, a total of 39 infants out of 195 died before  
337 reaching 550 days of age, with mortality occurring at a median age of 74 days (range 1-284  
338 days, n=17 known dates of death).

339 We defined interbirth intervals (IBI) as the number of days between two consecutive  
340 live births of the same female. We only considered IBIs for which the first infant reached  
341 weaning (29), i.e. survived until 550 days old. We discarded other IBIs as females resumed  
342 cycling rapidly after their infant's death when unweaned (median=21 days, range=9-51, n=9  
343 observed death), and their IBIs would have been shortened regardless of environmental  
344 seasonality. We computed a total of 120 interbirth intervals from 43 adult females, ranging  
345 from 397 to 1132 days with a mean of 678 days (SD=128).

346

347 **Behavioural observations**

348 In order to characterize variation in maternal care and in mother-offspring conflict, we used  
349 three behavioural indicators: suckling, infant carrying and tantrum frequencies. We also used  
350 these behavioural data, along with life history data, to assign different developmental stages,  
351 including the different stages of weaning and the peak of lactation after an infant's birth (see  
352 Appendix 4). In addition to life-history data, field observers collected behavioural data on  
353 infants aged between 2 and 24 months on a daily basis from dawn until dusk over four periods:  
354 from October to December 2006, from July to August 2017, from September to December  
355 2018, and from April to July 2019. We collected a total of 1185 hours of focal observation on  
356 69 infants across four field seasons (mean  $\pm$  SD = 17.1  $\pm$  7.8 hours of observations per infants,  
357 range = 6.3–34.6), with a mean of 40.7 focal observations per individual (SD=29.4). Focal  
358 observations were spread equally across the day (divided in four 3-h-long blocks) and focal  
359 individuals were chosen randomly, and never sampled more than once within a block. Focal  
360 observations durations were 1 h in 2006 and 20 min in 2017-2019, with a minimum of 10 min  
361 in all cases. We recorded the following activities on a continuous basis: suckling (when the  
362 focal individual had its mouth on its mother's nipple; we could not distinguish comfort from  
363 nutritive suckling), travelling alone, infant carrying (carried by the mother, either ventrally or  
364 dorsally) and other activities. We also collected events related to mother-offspring conflicts  
365 (see below). In addition, we collected scan observations every 5 minutes (n=16702 scans across  
366 3081 focal observations), including the activity of the focal individual.

367

### 368 Maternal care during weaning

369 Maternal care was quantified through two measures: suckling frequency and infant carrying  
370 frequency, which represent the two main energetic costs of maternal care before weaning (5,  
371 65). First, for each scan observation (taken every 5 min), we considered whether the infant was  
372 suckling (1) or not (0) to investigate the effect of birth timing on variation in suckling frequency.

373 In order to determine the best age window to consider, we explored age-related variation in  
374 suckling frequency, and found that suckling decreases gradually from 2 to 18 months old,  
375 before stabilizing to ca. 2% of the scans from 18 to 24 months old (Figure S2). In addition, the  
376 maximum length of post-partum amenorrhea, often used as a proxy for the end of weaning,  
377 lasted 550 days (i.e. 18.1 months) in this population (see above). Therefore, we considered only  
378 infants aged 2- to 18-months-old for this analysis, using 11687 scans from 55 infants. The birth  
379 date uncertainty for these 55 infants ranged from 0 to 130 days (with a median birth date  
380 uncertainty of 16 days) and was taken into account in subsequent models (see Appendix 5).

381         Second, for each scan observation during which an infant was travelling, we determined  
382 whether the infant was carried by its mother (1) or travelled on its own (0). This variable  
383 allowed us to monitor the gradual decrease from full maternal dependence to full independence  
384 during travelling. When looking for the best age window to consider, we observed that the  
385 proportion of infant carrying gradually decreases during the first year of life in our population  
386 (Figure S2), as in other baboon populations (65–67). Therefore, we considered infants aged  
387 from 2 to 12 months old for this analysis, using 924 scans from 35 infants.

388

### 389 Mother-infant conflicts during weaning

390 We considered infant tantrums as a behavioural measure of mother-offspring conflicts,  
391 reflecting when an infant's request to access resources from its mother was not initially satisfied  
392 (19). Tantrum occurrence started in early-life, peaked when infants were aged around 6-9  
393 months, and then gradually decreased during the end of their first and second year of life (Figure  
394 S2). Therefore, we considered only infants aged 2 to 18 months old for this analysis, using 2221  
395 focal observations from 55 infants. During each focal observation, we determined if a tantrum  
396 occurred (1) or not (0), based on a range of distinctive offspring vocalizations (gecks, moans  
397 and loud screams) and behaviours (frenzied behaviour when infants hurl themselves to the



398 ground, sometimes accompanied by rapidly rotating their tail) that were recorded on a  
399 continuous basis and are characteristic of baboon tantrums (21, 67). A tantrum was considered  
400 to occur when at least two of these behaviours or vocalizations were recorded, separated by at  
401 least 30s (isolated complaints, and complaints that lasted fewer than 30 seconds, were thus not  
402 considered as tantrums here). Tantrums were usually caused by maternal refusal of access to  
403 the nipple or to carrying, and more rarely by maternal absence.

404

## 405 **Statistical analysis**

### 406 Characterization of the reproductive seasonality of the Tsaobis baboons

407 First, to assess the strength and direction of reproductive seasonality, we used a Rayleigh test,  
408 from circular statistics, which characterizes the deviation of circular data from a uniform  
409 distribution, via the mean direction  $\mu$  and length  $R$  of the vector summing all observed events  
410 across the annual cycle ( $R=0$  when the event is evenly distributed, and  $R=1$  when all events are  
411 synchronized, i.e. occurs the same day) (68). Our sample comprised 241 conceptions, 215 births  
412 and 171 cycle resumptions which occurred between 2005 and 2019. Uncertainties in those dates  
413 were taken into account using 1000 randomized reproductive events for each variable  
414 (Appendix 5).

415

### 416 Birth timing effects on two fitness traits

417 To quantify the effect of birth timing on the probability of offspring mortality before weaning  
418 (Model 1), we ran a generalized linear mixed model (GLMM) with a binomial error structure.  
419 We then ran a linear mixed model (LMM, Model 2), testing the effect of birth timing on IBIs.

420 In both models, we used a sine term to describe the timing of an infant's birth in the  
421 annual cycle. Sine waves allow the introduction of a circular variable into a multivariate model  
422 as a fixed effect: the possible effects of the date of birth are circular with a period of one year,

423 as January 1<sup>st</sup> is equally close to December 31<sup>st</sup> than to January 2<sup>nd</sup>. This sinusoidal term was  
424 as follows:

$$425 \quad \sin(\text{Date of Birth} + \varphi)$$

426 The date of birth in the formula above was converted in a radian measure, so that the period,  
427 i.e. one year, equalled to  $2*\pi$ , ranging from  $2*\pi/365$  for January 1<sup>st</sup> to  $2*\pi$  for December 31<sup>st</sup>.  
428 We tested 12 different phase values  $\varphi$  ( $0, \pi/12, 2*\pi/12, 3*\pi/12, 4*\pi/12, 5*\pi/12, 6*\pi/12, 7*\pi/12,$   
429  $8*\pi/12, 9*\pi/12, 10*\pi/12, 11*\pi/12$ ), to account for different potential optimal periods for the  
430 event of interest across the year (24), as offspring mortality and IBI could be minimized for  
431 different birth dates (and so tested all potential dates as minimal). For example, a phase of 0  
432 could maximize April 1<sup>st</sup> or October 1<sup>st</sup> depending on the sign of the estimate (see Table S2).  
433 We ran sequentially these 12 multivariate models, containing all other fixed and random effects  
434 (see below), and selected the best phase as the one minimizing the Akaike Information Criterion  
435 (AIC) in this full model set: the phase of  $7*\pi/12$  was retained for offspring mortality probability,  
436 and of  $2*\pi/12$  for IBI (Table S2). We controlled for birth date uncertainty in both models using  
437 a set of 1000 randomized birth dates within the interval of uncertainty (see Appendix 5 for more  
438 details).

439 In both models, we included as random effects year of infant birth and identity of the  
440 mother to control for repeated observations. In both models, we also included maternal parity,  
441 rank (in the birth year of the focal infant) and infant sex as fixed effects, because maternal parity  
442 and rank often affect reproductive traits in primates, including baboons (29, 69, 70), while  
443 infant sex can affect both the mother's subsequent interbirth interval (71) and the probability  
444 of infant survival in sexually dimorphic primates (26, 32). We also control for group identity  
445 as a fixed effect in both models, as data were collected from only three groups in this study  
446 (72).

447

448 Characterization of optimal birth timings, and individual effects on birth timing

449 We investigated the individual determinants of female reproductive decisions over birth timing,  
450 based on 215 births from 62 females. We first used the results of Models 1 and 2 to characterize  
451 the optimal birth timings for offspring survival and maternal IBI respectively. Offspring  
452 mortality is minimised on December 15<sup>th</sup> (Table S2), and we thus computed, for each birth date,  
453 the deviation in days from December 15<sup>th</sup> (the maximum value of the deviation being 182 for  
454 June 15<sup>th</sup>). We used this deviation as a response variable of an LMM (Model 3) to investigate  
455 the individual determinants of giving birth close to, or away from, the timing that maximizes  
456 offspring survival. IBIs are minimised on September 1<sup>st</sup> (Table S2), and we thus computed, for  
457 each birth date, the deviation in days from September 1<sup>st</sup> (the maximum value of the deviation  
458 being 182 for March 1<sup>st</sup>). We used this deviation as a response variable of an LMM (Model 4),  
459 to investigate the individual determinants of giving birth close to, or away from, the timing that  
460 minimizes the maternal IBI.

461 For both Models 3 and 4, we tested the influence of infant sex, female parity and rank  
462 (as fixed effects) on the proximity of birth to the optimal timing for offspring survival (Model  
463 3) or for maternal IBI (Model 4). We also controlled for the identity of the mother and birth  
464 year as random effects, and for group identity as fixed effects (as there was only three levels  
465 for this factor (72)). We tested the significance of maternal identity using a likelihood-ratio test  
466 (LRT), comparing the model with and without this random effect. We controlled for birth date  
467 uncertainty in these models using a randomization procedure described in Appendix 5.

468

469 Birth timing effects on maternal care and tantrum probability

470 We ran three GLMMs with a binomial error structure to test the effect of birth timing on the  
471 probability of suckling (Model 5), infant carrying (Model 6), and tantrums (Model 7). Models  
472 5 and 6 are scan-based data: during a scan observation, the infant is suckling (yes/no, Model

473 5), and during a travelling scan observation, the infant is carried by its mother (yes/no, Model  
474 6). Model 7 is based on the entire focal observation as tantrum events are relatively rare: during  
475 a focal observation, the infant throws a tantrum (yes/no).

476 In order to investigate the potential effect of birth timing on maternal care and tantrum  
477 probability, we used a sine wave term for infant birth date as a fixed effect, following the  
478 method explained for Models 1-2. We did so to examine natural minimums or maximums in  
479 the frequency of each of these traits along the annual cycle, without making any *a priori*  
480 hypothesis on which periods were minimized or maximized, in order to test whether the  
481 observed maximums or minimums would match the periods previously identified as the optimal  
482 timings favouring current versus future reproduction. We therefore tested 12 different phases  
483 in each full model and retained a phase of  $9*\pi/12$  for suckling, 0 for infant carrying, and  $2*\pi/12$   
484 for tantrum probabilities. We controlled for birth dates uncertainty in all three models using the  
485 randomization procedure described in Appendix 5.

486 We included, as random effects, the identity of the infant (Models 5-7) to control for  
487 repeated observations. We also added the focal observation as a random effect for Models 5-6.  
488 We controlled for group identity and year of observation as fixed effects in all models, as there  
489 were less than five levels for both factors (72). In all models, we included maternal parity, rank  
490 (in the year of birth of the focal infant) and infant sex as fixed effects. Such parameters are  
491 likely to affect reproductive performances as well as the probabilities of maternal care and  
492 mother-offspring conflict (26, 67). For Model 7, we also controlled for the duration of focal  
493 observation as a fixed effect.

494 For Models 5-7, we further controlled for the effects of infant age, which modulates the  
495 amount of maternal care and probability of tantrums throughout early development (19, 26).  
496 We considered four different possibilities for the form of the relationship between infant age  
497 and the response variable, using a regression thin plate spline (general additive model), a simple

498 linear effect, and a polynomial regression (of 2 or 3 degrees), respectively (73). To determine  
499 the best fit, we ran these different preliminary models with no other fixed effect but including  
500 all random effects (and the duration of focal observation for Model 7), and selected the model  
501 minimizing the AIC. The age effect was linear for suckling and infant carrying probabilities  
502 (Model 5 and 6), and a second-degree polynomial for tantrum probability (Model 7).

503 Lastly, mothers might be expected to invest more, and similarly infants might be  
504 expected to have more requests for maternal care, during the lean season, irrespective of the  
505 developmental trajectory of the infant, i.e. regardless of its age and birth timing (whether it was  
506 born in the optimal period or not). Therefore, we also investigated the potential effect of  
507 seasonality by assessing the influence of the observation date on suckling, infant carrying and  
508 tantrum probabilities (see Appendix 1 for more details). We did not include in the same model  
509 observation date and birth date, as they give redundant information (observation date is, by  
510 definition, the sum of birth date and infant's age, and infant's age is already included as a fixed  
511 effect). We present our models of birth date effects in the main text (Models 5-7, see also Table  
512 S3), and our models of observation date effects in the Supplementary Information (Models 5bis-  
513 7bis, Table S4).

514 The structure of each model, with the different fixed and random effects included,  
515 alongside sample size, is summarised in Table S6.

516

### 517 Statistical methods

518 All statistical analyses were conducted in R version 3.5.0 (74). For the Rayleigh test, we used  
519 the function 'r.test' from the R package 'CircStats' (75). To run mixed models, we used 'lmer'  
520 (for LMMs) or 'glmer' (for binomial GLMMs) function on the lme4 package (76). To run  
521 general additive mixed models (GAMMs) when investigating the best age effects on suckling,  
522 infant carrying and tantrum probabilities, we used the 'gam' function of the 'mgcv' package

523 (73). All quantitative fixed effects were z-transformed to facilitate model convergence. When  
524 we obtained singular fits, we confirmed the results by running the same models with a Bayesian  
525 approach, using the ‘bglmer’ and ‘blmer’ functions of the ‘blme’ package (77). To diagnose the  
526 presence of multicollinearity, we calculated the variance inflation factor for each predictor in  
527 each full model using the ‘vif’ function of the R ‘car’ package (78). These were lower than 2.5  
528 in all cases. To assess the strength of the fixed effects in each model, we used the Wald chi-  
529 square tests with associated P-values computed with the ‘Anova’ function of the R package  
530 ‘car’ (78), and calculated the 95% Wald level confidence intervals. We further checked the  
531 distribution of residuals with ‘qqPlot’ function of the car package for LMMs (78), and with  
532 ‘simulateResiduals’ from DHARMA package for binomial GLMMs (79).

533

## 534 **DATA AND CODE AVAILABILITY**

535 The datasets necessary to run analyses included in this paper and the associated legends have  
536 been deposited in the public depository: [https://github.com/JulesDezeure/Maternal-trade-off-](https://github.com/JulesDezeure/Maternal-trade-off-over-birth-timing-in-baboon)  
537 [over-birth-timing-in-baboon](https://github.com/JulesDezeure/Maternal-trade-off-over-birth-timing-in-baboon)

538

## 539 **ACKNOWLEDGMENTS**

540 The authors are grateful to the Tsaobis Baboon Project volunteers from 2005 to 2019, and  
541 particularly to Harrison Anton, Charlotte Bright, Anna Cryer, Rémi Emeriau, Richard  
542 Gallagher, Chloe Hartland, Rachel Heaphy, Nick Matthews, Tess Nicholls, Vittoria Roatti and  
543 Ndapandula Shihepo for their dedicated effort at collecting focal observations on infant  
544 baboons. This research was carried out with the permission of the Ministry of Environment and  
545 Tourism, the Ministry of Land Reform, and the National Commission on Research, Science,  
546 and Technology. We further thank the Tsaobis beneficiaries for permission to work at Tsaobis,  
547 the Gobabeb Namib Research Institute and Training Centre for affiliation, and Johan Venter

548 and the Snyman and Wittreich families for permission to work on their land. Data used in this  
549 study are part of long-term data collected within the framework of the Tsaobis Baboon Project,  
550 recently funded by a grant from the Agence Nationale de la Recherche (ANR ERS-17-CE02-  
551 0008, 2018-2021) awarded to EH. This paper is a publication of the ZSL Institute of Zoology's  
552 Tsaobis Baboon Project. Contribution ISEM n°XX.

553

## 554 REFERENCES

- 555 1. F. H. Bronson, Climate change and seasonal reproduction in mammals. *Philos. Trans.*  
556 *R. Soc. B Biol. Sci.* **364**, 3331–3340 (2009).
- 557 2. D. K. Brockman, C. van Schaik, “Seasonality and reproductive function” in  
558 *Seasonality in Primates: Studies of Living and Extinct Human and Non-Human*  
559 *Primates*, Cambridge University Press, Ed. (2005), pp. 269–305.
- 560 3. C. P. van Schaik, M. A. van Noordwijk, Interannual variability in fruit abundance and  
561 the reproductive seasonality in Sumatran Long-tailed macaques (*Macaca fascicularis*).  
562 *J. Zool., Lond.* **206**, 533–549 (1985).
- 563 4. C. Janson, J. Verdolin, “Seasonality of primate births in relation to climate” in  
564 *Seasonality in Primates: Studies of Living and Extinct Human and Non-Human*  
565 *Primates*, (Cambridge University Press, 2005), pp. 307–350.
- 566 5. P. C. Lee, The meanings of weaning: growth, lactation, and life history. *Evol.*  
567 *Anthropol.* **5**, 87–98 (1996).
- 568 6. M. Emery Thompson, Comparative reproductive energetics of human and nonhuman  
569 primates. *Annu. Rev. Anthropol.* **42**, 287–304 (2013).
- 570 7. S. D. Lee, A. V. Ruiz-Lambides, J. P. Higham, Higher offspring mortality with short  
571 interbirth intervals in free-ranging rhesus macaques. *Proc. Natl. Acad. Sci.* **116**, 1–6  
572 (2019).

- 573 8. A. Conde-Agudelo, A. Rosas-Bermudez, F. Castaño, M. H. Norton, Effects of Birth  
574 Spacing on Maternal, Perinatal, Infant, and Child Health: A Systematic Review of  
575 Causal Mechanisms. *Stud. Fam. Plann.* **43**, 93–114 (2012).
- 576 9. S. C. Stearns, Trade-Offs in Life-History Evolution. *Funct. Ecol.* **3**, 259–268 (1989).
- 577 10. M. Krist, Egg size and offspring quality: A meta-analysis in birds. *Biol. Rev.* **86**, 692–  
578 716 (2011).
- 579 11. P. Bateson, The dynamics of parent-offspring relationships in mammals. *Trends Ecol.*  
580 *Evol.* **10**, 399–403 (1994).
- 581 12. M. W. G. Brinkhof, A. J. Cavé, S. Daan, A. C. Perdeck, Timing of current reproduction  
582 directly affects future reproductive output in european coots. *Evolution (N. Y.)*. **56**, 400–  
583 411 (2002).
- 584 13. J. Fischer, *et al.*, The Natural History of Model Organisms: Insights into the evolution  
585 of social systems and species from baboon studies. *Elife* **1960**, 1–16 (2019).
- 586 14. L. Barrett, S. P. Henzi, Baboons. *Curr. Biol.* **18**, 404–406 (2008).
- 587 15. L. Swedell, “African papionins: diversity of social organization and ecological  
588 flexibility” in *Primates in Perspective*, (Oxford University Press, 2011), pp. 241–277.
- 589 16. D. L. Cheney, *et al.*, Factors affecting reproduction and mortality among baboons in  
590 the Okavango Delta, Botswana. *Int. J. Primatol.* **25**, 401–428 (2004).
- 591 17. J. E. Lycett, T. Weingrill, S. P. Henzi, Birth patterns in the Drakensberg Mountain  
592 baboons (*Papio cynocephalus ursinus*). *S. Afr. J. Sci.* **95**, 354–356 (1999).
- 593 18. F. A. Campos, *et al.*, Does climate variability influence the demography of wild  
594 primates? Evidence from long-term life-history data in seven species. *Glob. Chang.*  
595 *Biol.* **23**, 1–15 (2017).
- 596 19. D. Maestriperi, Parent–offspring conflict in primates. *Int. J. Primatol.* **23**, 923–951  
597 (2002).



- 598 20. R. L. Trivers, “Parental Investment and Sexual Selection” in *Sexual Selection and the*  
599 *Descent of Man 1871-1971*, Harvard University, Ed. (1972), pp. 136–207.
- 600 21. L. Barrett, P. S. Henzi, Are baboon infants Sir Phillip Sydney’s offspring? *Ethology*  
601 **106**, 645–658 (2000).
- 602 22. H. N. Fouts, B. S. Hewlett, M. E. Lamb, Parent-Offspring weaning conflicts among the  
603 Bofi farmers and foragers of Central Africa. *Curr. Anthropol.* **46**, 29–50 (2005).
- 604 23. D. Zinner, F. Peí Aez, F. Torkler, Distribution and habitat associations of baboons  
605 (*Papio hamadryas*) in central Eritrea. *Int. J. Primatol.* **22**, 397–413 (2001).
- 606 24. J. Dezeure, *et al.*, Developmental transitions in body color in chacma baboon infants:  
607 Implications to estimate age and developmental pace. *Am. J. Phys. Anthropol.* **174**, 89–  
608 102 (2020).
- 609 25. K. Didan, A. Barreto Munoz, R. Solano, A. Huete, “MOD13A1 MODIS/Terra  
610 Vegetation Indices 16-Day L3 Global 500m SIN Grid V006 [Data set]” (2015)  
611 <https://doi.org/https://doi.org/10.5067/MODIS/MOD13A1.006>.
- 612 26. J. Altmann, *Baboon Mothers and Infants* (The University of Chicago Press, 1980).
- 613 27. R. J. Rhine, G. W. Norton, G. M. Wynn, R. D. Wynn, Plant feeding of yellow baboons  
614 (*Papio cynocephalus*) in Mikumi national park, Tanzania, and the relationship between  
615 seasonal feeding and immature survival. *Int. J. Primatol.* **10**, 319–342 (1989).
- 616 28. R. J. Rhine, G. W. Norton, G. M. Wynn, R. D. Wynn, Weaning of free-ranging infant  
617 baboons (*Papio cynocephalus*) as indicated by one-zero and instantaneous sampling of  
618 feeding. *Int. J. Primatol.* **6**, 491–499 (1985).
- 619 29. L. R. Gesquiere, J. Altmann, E. A. Archie, S. C. Alberts, Interbirth intervals in wild  
620 baboons: Environmental predictors and hormonal correlates. *Am. J. Phys. Anthropol.*  
621 **166**, 107–126 (2017).
- 622 30. J. Bulger, W. J. Hamilton, Rank and density correlates of inclusive fitness measures in

- 623 a natural chacma baboon (*Papio ursinus*) troop. *Int. J. Primatol.* **8**, 635–650 (1987).
- 624 31. C. Packer, D. A. Collins, A. Sindimwo, J. Goodall, Reproductive constraints on  
625 aggressive competition in female baboons. *Nature* **373**, 60–63 (1995).
- 626 32. E. V. Lonsdorf, Sex differences in nonhuman primate behavioral development. *J.*  
627 *Neurosci. Res.* **95**, 213–221 (2017).
- 628 33. T. H. Clutton-Brock, G. R. Iason, Sex ratio variation in mammals. *Q. Rev. Biol.* **61**,  
629 339–374 (1986).
- 630 34. T. M. Jones, *et al.*, Parental benefits and offspring costs reflect parent-offspring  
631 conflict over the age of fledging among songbirds. *PNAS* **117**, 30539–30546 (2020).
- 632 35. V. Lummaa, R. Lemmetyinen, E. Haukioja, M. Pikkola, Seasonality of births in *Homo*  
633 *sapiens* in pre-industrial Finland: maximisation of offspring survivorship? *J. Evol. Biol.*  
634 **11**, 147–157 (1998).
- 635 36. F. H. Bronson, *Mammalian Reproductive Biology* (The University of Chicago Press,  
636 1989).
- 637 37. F. H. Bronson, Seasonal variations in human reproduction: environmental factors. *Q.*  
638 *Rev. Biol.* **70**, 55 (1995).
- 639 38. P. T. Ellison, C. R. Valeggia, D. S. Sherry, “Human Birth Seasonality” in *Seasonality*  
640 *in Primates: Studies of Living and Extinct Human and Non-Human Primates*,  
641 (Cambridge University Press, 2005), pp. 379–399.
- 642 39. F. B. Bercovitch, R. S. O. Harding, Annual Birth Patterns of Savanna Baboons (*Papio*  
643 *cynocephalus anubis*) over a Ten-Year Period at Gilgil, Kenya. *Folia Primatol.* **61**,  
644 115–122 (1993).
- 645 40. S. A. Altmann, Fallback foods, eclectic omnivores, and the packaging problem. *Am. J.*  
646 *Phys. Anthropol.* **140**, 615–629 (2009).
- 647 41. R. A. Foley, “The influence of seasonality on hominid evolution” in *Seasonality and*

- 648 *Human Ecology*, (Cambridge University Press, 2010), pp. 17–37.
- 649 42. D. K. Brockman, “What do studies of seasonality in primates tell us about human  
650 evolution?” in *Seasonality in Primates: Studies of Living and Extinct Human and Non-  
651 Human Primates*, (Cambridge University Press, 2005), pp. 543–570.
- 652 43. E. Tinsley Johnson, N. Snyder-Mackler, A. Lu, T. J. Bergman, J. C. Beehner, Social  
653 and ecological drivers of reproductive seasonality in geladas. *Behav. Ecol.* **29**, 574–588  
654 (2018).
- 655 44. G. Kynast-Wolf, G. P. Hammer, O. Müller, B. Kouyaté, H. Becher, Season of death  
656 and birth predict patterns of mortality in Burkina Faso. *Int. J. Epidemiol.* **35**, 427–435  
657 (2006).
- 658 45. G. Doblhammer, J. W. Vaupel, Lifespan depends on month of birth. *Proc. Natl. Acad.  
659 Sci.* **98**, 2934–2939 (2001).
- 660 46. S. E. Moore, *et al.*, Season of births predict mortality in rural Gambia. *Nature* **388**,  
661 434–434 (1997).
- 662 47. P. C. Stouffer, E. I. Johnson, R. O. Bierregaard, Breeding seasonality in central  
663 Amazonian rainforest birds. *Auk* **130**, 529–540 (2013).
- 664 48. A. R. E. Sinclair, S. A. R. Mduma, P. Arcese, What determines phenology and  
665 synchrony of ungulate breeding in Serengeti? *Ecology* **81**, 2100–2111 (2000).
- 666 49. P. C. Wright, Lemur Traits and Madagascar Ecology: Coping With an Island  
667 Environment. *Yearb. Phys. Anthropol.* **42**, 31–72 (1999).
- 668 50. L. Barrett, S. P. Henzi, J. E. Lycett, “Whose Life Is It Anyway? Maternal Investment,  
669 Developmental Trajectories, and Life History Strategies in Baboons” in *Reproduction  
670 and Fitness in Baboons: Behavioral, Ecological, and Life History Perspectives*,  
671 Springer, (2006), pp. 199–224.
- 672 51. W. Saltzman, S. D. Tardif, J. N. Rutherford, “Hormones and Reproductive Cycles in

- 673 Primates” in *Hormones and Reproduction of Vertebrates*, Norris DO, Lopez K, Eds.  
674 (NY Academic Press, 2011), pp. 1–40.
- 675 52. P. C. Lee, P. Majluf, I. J. Gordon, Growth, weaning and maternal investment from a  
676 comparative perspective. *J. Zool.* **225**, 99–114 (1991).
- 677 53. P. C. Lee, Nutrition, fertility and maternal investment in primates. *J. Zool.* **213**, 409–  
678 422 (1987).
- 679 54. V. Lummaa, T. Vuorisalo, R. G. Barr, L. Lehtonen, Why Cry? Adaptive Significance  
680 of Intensive Crying in Human Infants. *Evol. Hum. Behav.* **19**, 193–202 (1998).
- 681 55. J. C. Fotso, J. Cleland, B. Mberu, M. Mutua, P. Elungata, Birth spacing and child  
682 mortality: An analysis of prospective data from the nairobi urban health and  
683 demographic surveillance system. *J. Biosoc. Sci.* **45**, 779–798 (2013).
- 684 56. J. E. Miller, G. Rodriguez, A. R. Pebley, Lactation, Seasonality, and Mother’s  
685 Postpartum Weight Change in Bangladesh: An Analysis of Maternal Depletion. *Am. J.*  
686 *Hum. Biol.* **651**, 1–524 (1994).
- 687 57. P. de Villemereuil, *et al.*, Fluctuating optimum and temporally variable selection on  
688 breeding date in birds and mammals. *PNAS*, 1–10 (2020).
- 689 58. G. Ljungström, T. B. Francis, M. Mangel, C. Jørgensen, Parent-offspring conflict over  
690 reproductive timing: Ecological dynamics far away and at other times may explain  
691 spawning variability in Pacific herring. *ICES J. Mar. Sci.* **76**, 559–572 (2019).
- 692 59. G. Cowlshaw, J. G. Davies, Flora of the Pro-Namib Desert Swakop River catchment,  
693 Namibia: community classification and implications for desert vegetation sampling. *J.*  
694 *Arid Environ.* **36**, 271–290 (1997).
- 695 60. A. Savtchenko, “TRMM (TMPA) Precipitation L3 1 day 0.25 degree x 0.25 degree  
696 V7” (2016).
- 697 61. C. Calenge, The package “adehabitat” for the R software: A tool for the analysis of

- 698 space and habitat use by animals. *Ecol. Modell.* **197**, 516–519 (2006).
- 699 62. A. M. Bronikowski, J. Altmann, Foraging in a variable environment: weather patterns  
700 and the behavioral ecology of baboons. *Behav Ecol Sociobiol* **39**, 11–25 (1996).
- 701 63. E. Huchard, G. Cowlishaw, Female – female aggression around mating : an extra cost  
702 of sociality in a multimale primate society. *Behav. Ecol.* **22**, 1003–1011 (2011).
- 703 64. C. Borries, A. Lu, K. Ossi-Lupo, E. Larney, A. Koenig, The meaning of weaning in  
704 wild Phayre’s leaf monkeys: Last nipple contact, survival, and independence. *Am. J.*  
705 *Phys. Anthropol.* **154**, 291–301 (2014).
- 706 65. J. Altmann, A. Samuels, Costs of maternal care: infant-carrying in baboons. *Behav.*  
707 *Ecol. Sociobiol.* **29**, 391–398 (1992).
- 708 66. R. J. Rhine, G. W. Norton, B. J. Westlund, The Waning of Dependence in Infant Free-  
709 Ranging Yellow Baboons (*Papio cynocephalus*) of Mikumi National Park. *Am. J.*  
710 *Primatol.* **7**, 213–228 (1984).
- 711 67. N. Nicolson, “Weaning and the Development of Independence in Olive Baboons,”  
712 Harvard University, Cambridge, Massachusetts. (1982)  
713 <https://doi.org/10.13140/RG.2.1.4000.9761>.
- 714 68. E. Batschelet, *Circular Statistics in Biology (Mathematics in Biology)*, Academic Press  
715 (1981).
- 716 69. J. Altmann, S. C. Alberts, Growth rates in a wild primate population: ecological  
717 influences and maternal effects. *Behav. Ecol. Sociobiol.* **57**, 490–501 (2005).
- 718 70. A. Pusey, “Magnitude and sources of variation in female reproductive performance” in  
719 *The Evolution of Primate Societies*, University of Chicago Press, Ed. (University of  
720 Chicago Press, 2012), pp. 343–367.
- 721 71. F. B. Bercovitch, J. D. Berard, Behavioral Ecology and Sociobiology Life history costs  
722 and consequences of rapid reproductive maturation in female rhesus macaques. *Behav*

- 723            *Ecol Sociobiol* **32**, 103–109 (1993).
- 724    72.    X. A. Harrison, *et al.*, Best practice in mixed effects modelling and multi-model  
725            inference in ecology. *PeerJ Open Access* (2017)  
726            <https://doi.org/10.7287/peerj.preprints.3113v1>.
- 727    73.    S. N. Wood, Thin plate regression splines. *J. R. Stat. Soc. Stat. Methodol. Ser. B* **65**,  
728            95–114 (2003).
- 729    74.    R Core Team, “R: A language and environment for statistical computing” (2019).
- 730    75.    C. Agostinelli, U. Lund, “Package ‘CircStats’: Circular Statistics, from ‘Topics in  
731            Circular Statistics’” (2018).
- 732    76.    D. Bates, M. Mächler, B. M. Bolker, S. C. Walker, Fitting linear mixed-effects models  
733            using lme4. *J. Stat. Softw.* **67** (2015).
- 734    77.    V. Dorie, “blme: Bayesian Linear Mixed-Effects models” (2015).
- 735    78.    J. Fox, *et al.*, “Companion to Applied Regression” (2019).
- 736    79.    F. Hartig, “Package ‘DHARMA’: Residual Diagnostics for Hierarchical (Multi-Level /  
737            Mixed) Regression Models” (2020).
- 738
- 739

740 **TABLES**

741 **Table 1:** Predictors of female reproductive timing.

742 Estimates, confidence intervals,  $X^2$  statistics and P-values of the predictors of the two linear mixed models (Models  
 743 3 and 4). The response variables are respectively the deviation from the offspring survival optimal birth timing,  
 744 i.e. from December 15<sup>th</sup> (Model 3), and the deviation from the maternal IBI optimal birth timing, i.e. from  
 745 September 1<sup>st</sup> (Model 4), in days, based on 215 births from 62 females. Female identity and year of infant birth are  
 746 included as random effects. For categorical predictors, the tested category is indicated between parentheses.

| Fixed effect                                                               |               | Estimate | IC     |       | $X^2$ | P-value |
|----------------------------------------------------------------------------|---------------|----------|--------|-------|-------|---------|
|                                                                            |               |          | Lower  | Upper |       |         |
| <b>Model 3: Deviation from the offspring survival optimal birth timing</b> |               |          |        |       |       |         |
| Infant sex                                                                 | (Male)        | 5.91     | -7.42  | 19.23 | 0.76  | 0.385   |
| Female parity                                                              | (Primiparous) | -12.77   | -30.02 | 4.47  | 2.11  | 0.147   |
| Female rank                                                                |               | 2.59     | -4.82  | 10.00 | 0.47  | 0.493   |
| Group                                                                      | (L)           | 5.16     | -10.37 | 20.69 | 1.33  | 0.515   |
|                                                                            | (M)           | -12.66   | -44.70 | 19.39 |       |         |
| <b>Model 4: Deviation from the maternal IBI optimal birth timing</b>       |               |          |        |       |       |         |
| Infant sex                                                                 | (Male)        | -3.19    | -16.46 | 10.08 | 0.22  | 0.7637  |
| Female parity                                                              | (Primiparous) | 9.67     | -7.49  | 26.82 | 1.22  | 0.269   |
| Female rank                                                                |               | -3.41    | -10.75 | 3.92  | 0.83  | 0.362   |
| Group                                                                      | (L)           | 10.67    | -4.70  | 26.04 | 1.92  | 0.382   |
|                                                                            | (M)           | 0.93     | -30.91 | 32.78 |       |         |

747

748 **FIGURES**

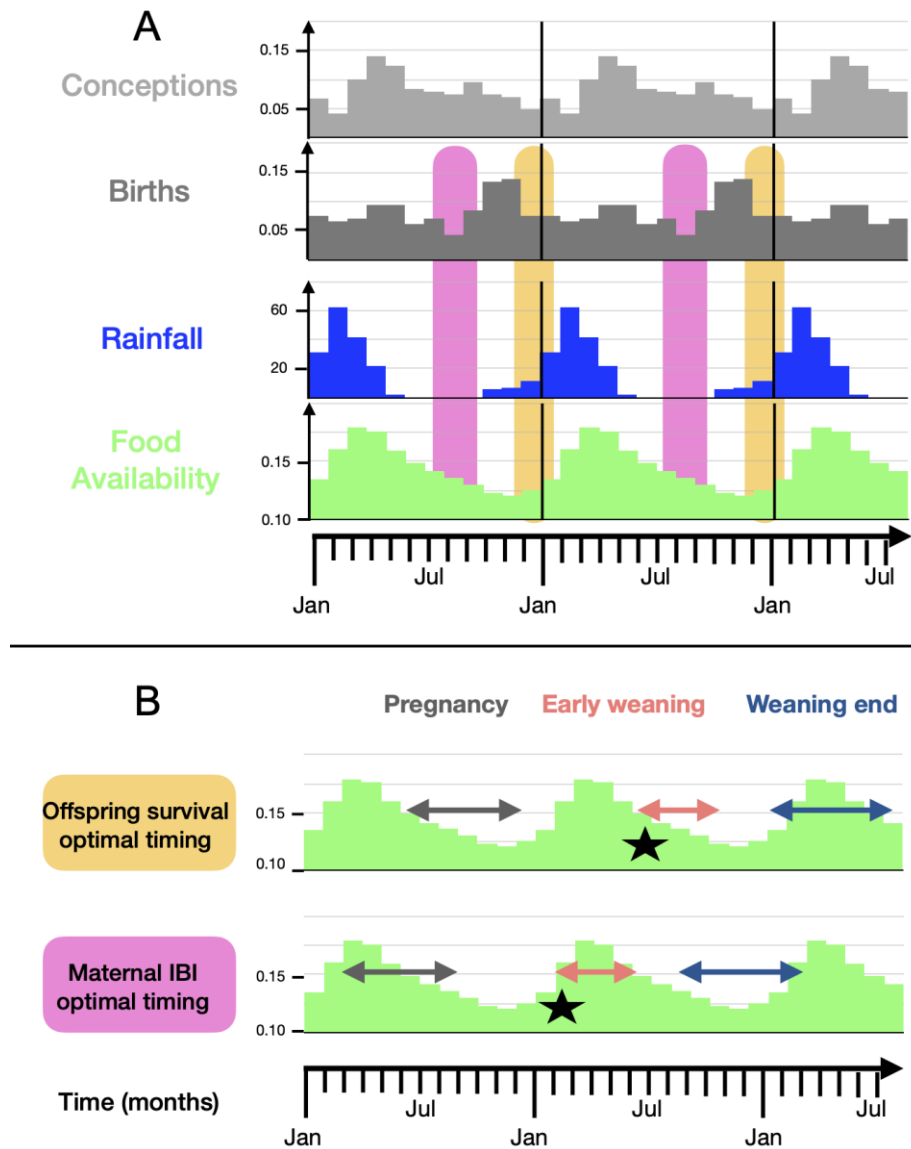

749

750 **Figure 1:** Tsaobis baboons' reproductive timings in relation with environmental seasonality.

751 In Panel A, we plotted the proportion of conceptions (N=241, in light grey) and births (N=215, in dark grey)

752 recorded in 2005-2019 per month (Jan for January, Jul for July). We plotted the mean monthly cumulative rainfall

753 (in mm) per month in blue and the mean NDVI value per month in green between 2005 and 2019. The orange and

754 pink squares in the background represent resp. the offspring survival and the maternal IBI optimal birth timings.

755 In Panel B, we aimed to represent the different phases of the female reproductive cycle, when the birth date occurs

756 within the offspring survival (December 15<sup>th</sup>) or maternal IBI (September 1<sup>st</sup>) optimal timing, according to seasonal

757 variation of NDVI. The green bar plot in the background indicates the mean NDVI per month (see y-axis).

758 Pregnancy, indicated with grey arrows, occurs the 6 months prior a birth. Early-weaning, indicated with salmon-

759 colour arrows, occurs from 6 to 9 months after a birth. Lactation peak, indicated with black stars, occur around 6

760 months after a birth. Weaning end, indicated with blue arrows, occurs from 12 to 18 months after a birth (see

761 Appendix 4 for the characterization of these different reproductive stages).



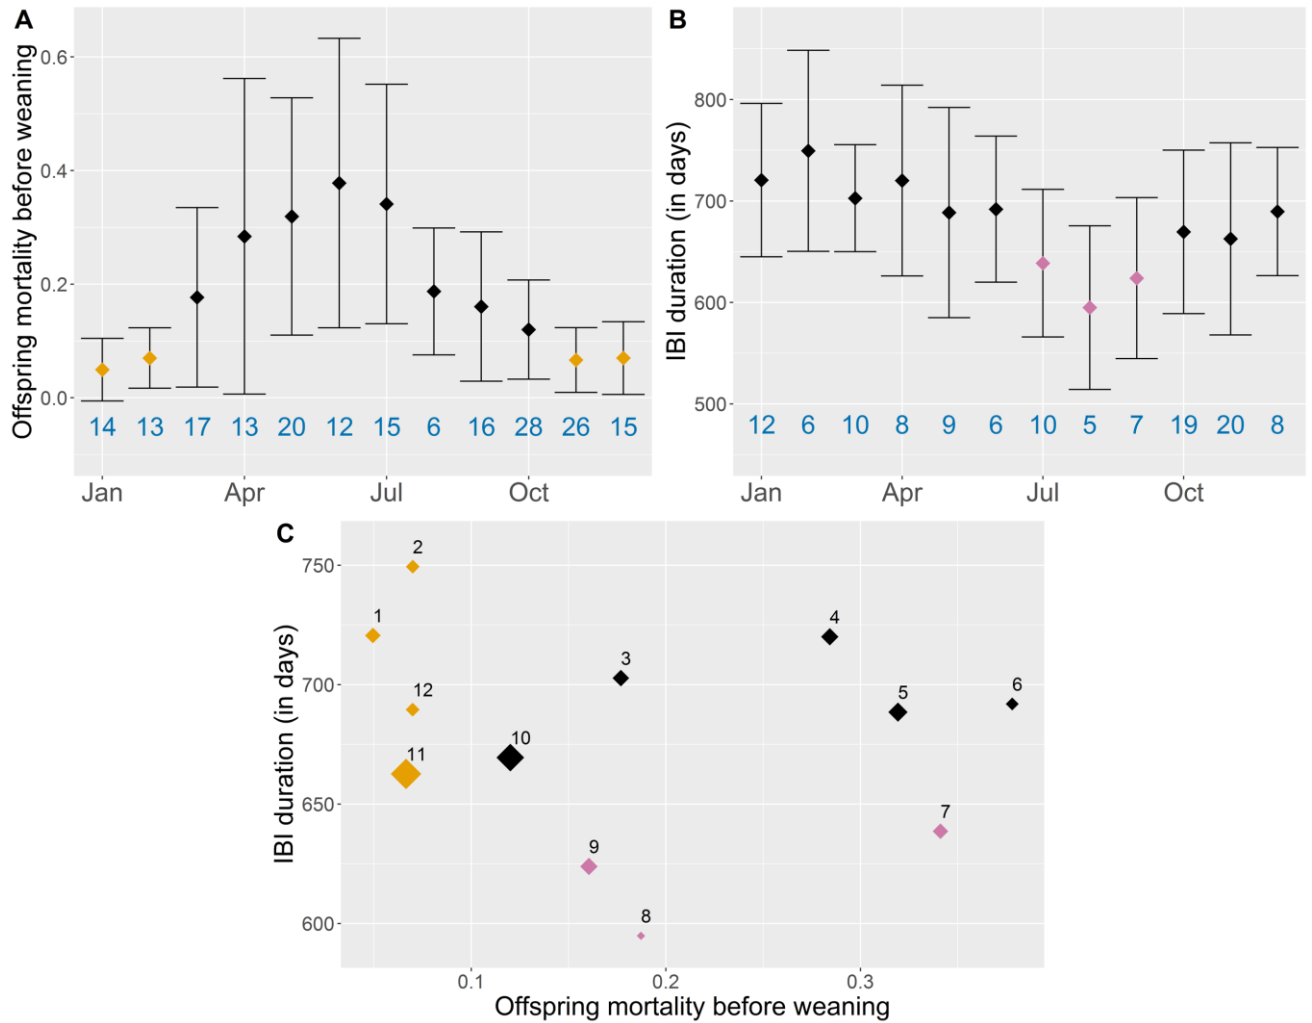

762

763 **Figure 2:** Distinct optimal birth timings for current and future reproduction.

764 We plotted the predicted values of the full models (Model 1 looking at offspring mortality in panel A, and Model  
765 2 looking at IBIs in panel B) according to the month of infant birth (Jan for January, Apr for April, etc.). The  
766 number of births observed for each month is indicated in blue below the bar. The dots represent the mean values,  
767 while the vertical black bars represent its standard deviations. The offspring survival optimal birth timing is  
768 identified as the period minimizing offspring mortality, i.e. from November to February, and indicated with orange  
769 dots (Panel A and C). The maternal IBI optimal birth timing is identified as the period minimizing maternal  
770 interbirth interval, i.e. from July to September, and indicated with pink dots (Panel B and C). In panel C, we  
771 represented the trade-off experienced by mothers over birth timing: each dot represents the predicted value of IBI  
772 according to the predicted value of offspring mortality for a given month birth (see label, 1 for January, 2 for  
773 February, etc.). The size of the dot is proportional to the number of births observed each month. We can notice an  
774 absence of points on the extreme bottom-left corner (i.e. with both low infant mortality - inferior to 0.10 - and  
775 short IBI - lower than 650 days), showing the existence of a reproductive trade-off. In addition, the highest number  
776 of births occur for the points closer to this bottom-left corner (months 10 & 11), indicating that mothers target a  
777 birth timing trading-off these two fitness components.

778

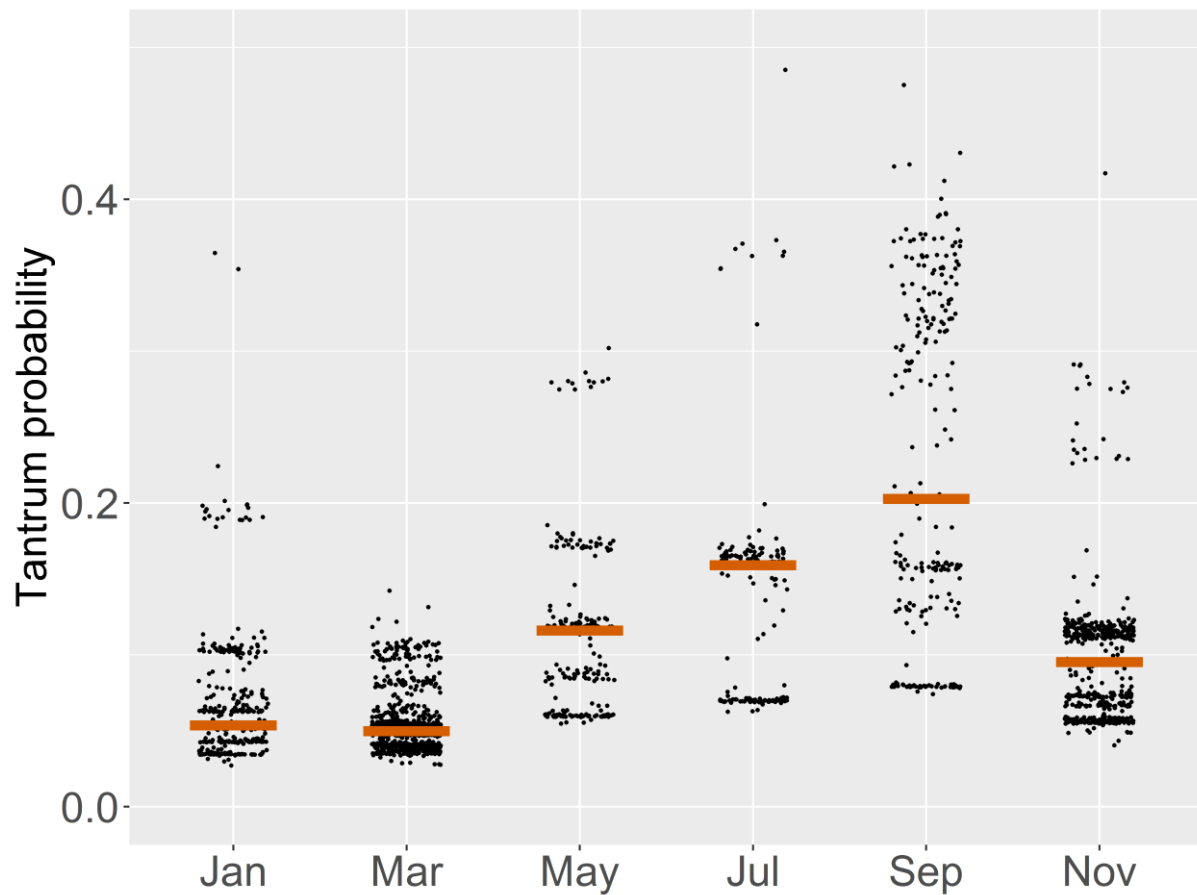

779

780 **Figure 3:** Influence of birth timing on tantrum probability.

781 Predicted values of tantrum probability (Model 7) at weaning (age 12 months), according to infants' birth month,  
782 based on 2221 focal observations from 55 infants. For graphical reasons, and given the low sample size of infants  
783 observed for some birth months, we pooled infants born in 2 consecutive months, so that Jan indicates infants born  
784 in both January and February, Mar in both March and April, etc. The brown horizontal bars indicate the median  
785 values of fitted values for each birth month category.

786
